# Supplementary material for: Modified aptamers as reagents to characterize recombinant human erythropoietin products
Source: PubMed Central journal article supplement (PMC7596557; doi:10.1038/s41598-020-75713-2), 2020-10-29
Supplement: 41598_2020_75713_MOESM2_ESM.pdf [file 41598_2020_75713_MOESM2_ESM.pdf]

| Supplemental Table 2: |         |          |          |          |       |          |          |
|-----------------------|---------|----------|----------|----------|-------|----------|----------|
| SOMAmer               | Product | kD       |          | ka       |       | kd       |          |
|                       |         | KD       | Error    | ka       | Error | kd       | Error    |
| SL5001                | BiSi-1  | 2.27e-09 | 1.48e-11 | 1.14e+05 | 615   | 9.5e-07  | 1.00e-06 |
| SL5001                | BiSi-1  | 1.25e-09 | 1.53e-11 | 2.76e+05 | 2900  | 2.16e-06 | 2.20e-06 |
| SL5001                | BiSi-1  | 4.30e-09 | 1.17e-10 | 8.18e+04 | 2740  | 1.45e-06 | 1.50e-06 |
| SL5001                | BiSi-1  | 1.07e-09 | 3.12e-11 | 2.40e+05 | 8440  | 2.05e-06 | 2.00e-06 |
| SL5001                | BiSi-1  | 1.72e-09 | 5.76e-10 | 4.84e+04 | 20000 | 2.26e-06 | 2.30e-06 |
| SL5001                | BiSi-2  | 2.15e-09 | 1.72e-11 | 1.18e+05 | 767   | 1.17e-06 | 1.20e-06 |
| SL5001                | BiSi-2  | 2.00e-09 | 2.97e-11 | 2.11e+05 | 2860  | 2.52e-06 | 2.50e-06 |
| SL5001                | BiSi-3  | 2.57e-09 | 2.06e-11 | 1.17e+05 | 797   | 1.25e-06 | 1.30e-06 |
| SL5001                | BiSi-3  | 1.83e-09 | 1.77e-11 | 1.94e+05 | 1690  | 1.47e-06 | 1.50e-06 |
| SL5001                | BiSi-3  | 2.81e-09 | 4.34e-11 | 1.45e+05 | 2710  | 1.43e-06 | 1.40e-06 |
| SL5001                | BiSi-3  | 2.51e-09 | 5.74e-10 | 2.42e+04 | 6770  | 1.51e-06 | 1.50e-06 |
| SL5001                | Epogen  | 2.43e-09 | 1.82e-11 | 102900   | 642.8 | 1.03e-06 | 1.00e-06 |
| SL5001                | Epogen  | 1.35e-09 | 1.49e-11 | 219400   | 2075  | 1.67e-06 | 1.70e-06 |
| SL5001                | Epogen  | 4.89e-10 | 7.64e-12 | 580400   | 7384  | 2.58e-06 | 2.60e-06 |
| SL5001                | Epogen  | 5.34e-09 | 5.24e-11 | 29100    | 171   | 1.22e-06 | 1.20e-06 |
| SL5001                | Epogen  | 3.23e-09 | 2.54e-11 | 47200    | 218   | 9.73e-07 | 1.00e-06 |
| SL5001                | Epogen  | 2.91e-09 | 1.49e-11 | 57400    | 194   | 6.38e-07 | 6.00e-07 |
| SL5001                | Epogen  | 2.57e-09 | 1.43e-11 | 66000    | 288   | 5.85e-07 | 6.00e-07 |
| SL5001                | Epogen  | 2.03e-09 | 3.66e-11 | 67600    | 1110  | 1e-06    | 1.00e-06 |
| SL5001                | Epogen  | 2.27e-09 | 1.68e-11 | 1.08e+05 | 656   | 1.03e-06 | 1.00e-06 |
| SL5001                | Epogen  | 1.19e-09 | 1.27e-11 | 2.38e+05 | 2140  | 1.65e-06 | 1.60e-06 |
| SL5001                | Epogen  | 1.98e-09 | 1.23e-10 | 5.35e+04 | 3970  | 1.8e-06  | 1.80e-06 |
| SL5001                | Epogen  | 1.42e-08 | 9.82e-09 | 1.22e+04 | 10400 | 2.5e-06  | 2.50e-06 |
| SL5001                | Mouse   | 5.64e-10 | 1.77e-12 | 2.54e+05 | 639   | 2.7e-07  | 3.00e-07 |
| SL5001                | Mouse   | 6.08e-10 | 3.59e-12 | 2.59e+05 | 1430  | 3.27e-07 | 3.00e-07 |
| SL5001                | Mouse   | 4.61e-10 | 5.53e-12 | 3.61e+05 | 4190  | 4.9e-07  | 5.00e-07 |
| SL5001                | NLP-1   | 8.95e-10 | 9.91e-12 | 171000   | 1110  | 1.37e-06 | 1.40e-06 |
| SL5001                | NLP-1   | 5.64e-10 | 3.75e-12 | 154000   | 598   | 4.7e-07  | 5.00e-07 |
| SL5001                | NLP-1   | 5.99e-10 | 1.3e-11  | 125000   | 2200  | 9.53e-07 | 1.00e-06 |
| SL5001                | NLP-2   | 6.57e-10 | 7.02e-12 | 3.46e+05 | 3130  | 1.3e-06  | 1.30e-06 |
| SL5001                | NLP-2   | 1.07e-09 | 2.90e-11 | 2.20e+05 | 5800  | 1.41e-06 | 1.40e-06 |
| SL5001                | NLP-2   | 1.10e-08 | 8.73e-09 | 2.19e+04 | 17400 | 2.2e-06  | 2.20e-06 |
| SL5001                | NLP-3   | 5.35e-09 | 2.55e-11 | 33900    | 108   | 6.46e-07 | 6.00e-07 |
| SL5001                | NLP-3   | 4.69e-09 | 2.09e-11 | 40400    | 139   | 5.39e-07 | 5.00e-07 |
| SL5001                | NLP-3   | 5.91e-09 | 6.89e-11 | 30200    | 328   | 7.51e-07 | 8.00e-07 |
| SL5001                | NLP-4   | 1.57e-09 | 9.32e-12 | 1.32e+05 | 582   | 8.19e-07 | 8.00e-07 |
| SL5001                | NLP-4   | 9.09e-10 | 9.71e-12 | 2.13e+05 | 1740  | 1.33e-06 | 1.30e-06 |
| SL5001                | NLP-4   | 1.70e-09 | 2.61e-11 | 1.37e+05 | 2490  | 1.18e-06 | 1.20e-06 |
| SL5001                | NLP-4   | 1.44e-08 | 8.47e-09 | 1.21e+04 | 8850  | 2.14e-06 | 2.10e-06 |
| SL5001                | NLP-5   | 1.08e-09 | 1.03e-11 | 1.67e+05 | 1060  | 1.28e-06 | 1.30e-06 |
| SL5001                | NLP-5   | 1.87e-09 | 2.11e-11 | 1.51e+05 | 2020  | 9.81e-07 | 1.00e-06 |
| SL5001                | NLP-5   | 6.46e-10 | 1.11e-11 | 3.00e+05 | 5940  | 1.36e-06 | 1.40e-06 |
| SL5001                | NLP-5   | 4.91e-10 | 1.79e-11 | 3.17e+05 | 13800 | 1.6e-06  | 1.60e-06 |
| SL5001                | NLP-6   | 2.21e-09 | 2.35e-11 | 1.46e+05 | 1310  | 1.86e-06 | 1.90e-06 |
| SL5001                | NLP-6   | 1.22e-09 | 1.50e-11 | 3.01e+05 | 3200  | 2.3e-06  | 2.30e-06 |
| SL5001                | NLP-6   | 1.15e-09 | 1.28e-11 | 2.36e+05 | 2960  | 1.35e-06 | 1.40e-06 |
| SL5001                | NLP-6   | 8.69e-10 | 3.47e-11 | 2.14e+05 | 10100 | 2.36e-06 | 2.40e-06 |
| SL5001                | NLP-7   | 1.77e-09 | 8.89e-12 | 1.13e+05 | 431   | 6.47e-07 | 6.00e-07 |
| SL5001                | NLP-7   | 9.87e-10 | 8.48e-12 | 2.01e+05 | 1350  | 1.06e-06 | 1.10e-06 |
| SL5001                | NLP-7   | 4.76e-10 | 6.19e-12 | 5.31e+05 | 5510  | 1.98e-06 | 2.00e-06 |
| SL5001                | NLP-7   | 2.85e-09 | 4.99e-11 | 6.98e+04 | 1480  | 7.13e-07 | 7.00e-07 |
| SL5001                | NLP-7   | 1.19e-08 | 2.87e-09 | 1.72e+04 | 5110  | 1.26e-06 | 1.30e-06 |
| SL5001                | NLP-8   | 1.80e-09 | 7.51e-12 | 1.21e+05 | 390   | 5.75e-07 | 6.00e-07 |
| SL5001                | NLP-8   | 9.40e-10 | 6.93e-12 | 2.23e+05 | 1280  | 9.7e-07  | 1.00e-06 |
| SL5001                | NLP-8   | 3.78e-10 | 4.68e-12 | 5.10e+05 | 4610  | 1.63e-06 | 1.60e-06 |
| SL5001                | NLP-8   | 1.06e-08 | 6.44e-10 | 2.29e+04 | 1710  | 6.63e-07 | 9.00e-07 |
| SL5001                | NLP-8   | 2.44e-08 | 1.67e-08 | 9.32e+03 | 7930  | 1.99e-06 | 2.00e-06 |
| SL5001                | Procrit | 4.07e-09 | 4.24e-11 | 35200    | 215   | 1.21e-06 | 1.20e-06 |
| SL5001                | Procrit | 3.03e-09 | 2.1e-11  | 49100    | 197   | 8.41e-07 | 8.00e-07 |
| SL5001                | Procrit | 2.67e-09 | 1.23e-11 | 63900    | 193   | 5.95e-07 | 6.00e-07 |
| SL5001                | Procrit | 2.33e-09 | 1.23e-11 | 73600    | 297   | 5.87e-07 | 6.00e-07 |
| SL5001                | Procrit | 2.46e-09 | 4.11e-11 | 88500    | 1380  | 1.28e-06 | 1.30e-06 |
| SL5001                | Procrit | 2.13e-09 | 1.48e-11 | 1.08e+05 | 605   | 9.39e-07 | 9.00e-07 |
| SL5001                | Procrit | 1.38e-09 | 1.15e-11 | 1.86e+05 | 1330  | 1.1e-06  | 1.10e-06 |
| SL5001                | Procrit | 3.26e-08 | 2.20e-08 | 5.58e+03 | 3760  | 1.83e-06 | 1.80e-06 |
| SL5002                | BiSi-1  | 2.54e-09 | 3.09e-11 | 2.08e+05 | 2270  | 2.86e-06 | 2.90e-06 |
| SL5002                | BiSi-1  | 7.01e-10 | 1.33e-11 | 1.64e+05 | 3180  | 1.28e-06 | 1.40e-06 |
| SL5002                | BiSi-1  | 1.13e-08 | 1.14e-08 | 7.89e+03 | 9860  | 2.35e-06 | 2.20e-06 |
| SL5002                | BiSi-2  | 3.57e-09 | 2.78e-11 | 1.29e+05 | 910   | 1.51e-06 | 1.50e-06 |
| SL5002                | BiSi-2  | 1.77e-09 | 1.63e-11 | 2.68e+05 | 2240  | 1.83e-06 | 1.80e-06 |
| SL5002                | BiSi-2  | 3.53e-10 | 6.54e-12 | 2.94e+05 | 4240  | 1.66e-06 | 1.70e-06 |
| SL5002                | BiSi-2  | 3.05e-10 | 8.08e-12 | 3.81e+05 | 9830  | 2.09e-06 | 2.10e-06 |
| SL5002                | BiSi-3  | 9.18e-10 | 3.18e-11 | 1.24e+05 | 4680  | 2.07e-06 | 2.10e-06 |
| SL5002                | BiSi-3  | #VALUE!  | 1.64e-10 | #VALUE!  | 12000 | NA       | NA       |
| SL5002                | Epogen  | 5.54e-09 | 8.14e-11 | 121100   | 1680  | 3.26e-06 | 3.30e-06 |
| SL5002                | Epogen  | 4.92e-09 | 1.03e-10 | 232800   | 4687  | 6.16e-06 | 6.20e-06 |
| SL5002                | Epogen  | 1.63e-09 | 4.51e-11 | 924000   | 24280 | 1.29e-05 | 1.29e-05 |
| SL5002                | Epogen  | 2.15e-08 | 1.36e-10 | 14600    | 74.8  | 1.18e-06 | 1.20e-06 |
| SL5002                | Epogen  | 1.71e-08 | 1.05e-10 | 19400    | 97.8  | 1.16e-06 | 1.20e-06 |
| SL5002                | Epogen  | 1.2e-08  | 7e-11    | 27800    | 139   | 1.02e-06 | 1.00e-06 |
| SL5002                | Epogen  | 8.82e-09 | 4.78e-11 | 37100    | 180   | 7.81e-07 | 8.00e-07 |
| SL5002                | Epogen  | 5.01e-09 | 3.74e-11 | 60800    | 414   | 9.33e-07 | 9.00e-07 |
| SL5002                | Epogen  | 2.70e-09 | 3.22e-11 | 1.86e+05 | 1980  | 2.69e-06 | 2.70e-06 |
| SL5002                | Mouse   | 5.91e-10 | 4.86e-12 | 4.22e+05 | 2890  | 1.14e-06 | 1.10e-06 |
| SL5002                | Mouse   | 4.38e-10 | 4.08e-12 | 7.02e+05 | 5860  | 1.28e-06 | 1.30e-06 |
| SL5002                | Mouse   | 1.60e-10 | 1.87e-12 | 1.29e+06 | 12600 | 1.32e-06 | 1.30e-06 |
| SL5002                | NLP-1   | 1.6e-09  | 1.34e-11 | 89400    | 494   | 8.99e-07 | 9.00e-07 |
| SL5002                | NLP-1   | 1.4e-09  | 1.28e-11 | 120000   | 840   | 1e-06    | 1.00e-06 |
| SL5002                | NLP-1   | 1.47e-09 | 1.54e-11 | 137000   | 1250  | 1.07e-06 | 1.10e-06 |
| SL5002                | NLP-2   | 9.61e-10 | 1.20e-11 | 3.50e+05 | 3970  | 1.7e-06  | 1.80e-06 |
| SL5002                | NLP-2   | 6.71e-10 | 1.30e-11 | 5.50e+05 | 10100 | 2.41e-06 | 2.40e-06 |
| SL5002                | NLP-3   | 1.3e-08  | 9.57e-11 | 20800    | 131   | 1.05e-06 | 1.00e-06 |
| SL5002                | NLP-3   | 1.23e-08 | 1.57e-10 | 21400    | 255   | 1.19e-06 | 1.20e-06 |
| SL5002                | NLP-3   | 2.2e-08  | 9.89e-10 | 11100    | 495   | 1.24e-06 | 1.20e-06 |
| SL5002                | NLP-4   | 1.02e-08 | 2.89e-10 | 2.80e+05 | 7680  | 1.92e-05 | 1.92e-05 |
| SL5002                | NLP-5   | 3.48e-09 | 3.67e-11 | 1.49e+05 | 1430  | 2.2e-06  | 2.30e-06 |
| SL5002                | NLP-5   | 8.88e-09 | 1.19e-09 | 1.88e+04 | 3100  | 1.49e-06 | 1.50e-06 |
| SL5002                | NLP-5   | 1.17e-08 | 5.28e-09 | 1.43e+04 | 7990  | 1.92e-06 | 1.90e-06 |
| SL5002                | NLP-5   | 2.72e-09 | 1.75e-09 | 2.92e+04 | 23200 | 2.63e-06 | 2.60e-06 |
| SL5002                | NLP-6   | 3.20e-08 | 1.54e-09 | 7.65e+04 | 3640  | 1.95e-05 | 1.95e-05 |
| SL5002                | NLP-6   | 9.83e-09 | 4.07e-10 | 3.11e+05 | 12500 | 3.12e-05 | 3.12e-05 |
| SL5002                | NLP-6   | 1.21e-09 | 3.00e-11 | 1.50e+05 | 4250  | 1.93e-06 | 1.90e-06 |
| SL5002                | NLP-7   | 4.07e-09 | 3.46e-11 | 1.33e+05 | 1050  | 1.79e-06 | 1.80e-06 |
| SL5002                | NLP-7   | 2.64e-09 | 3.57e-11 | 3.79e+05 | 4830  | 4.43e-06 | 4.40e-06 |
| SL5002                | NLP-7   | 1.19e-09 | 2.11e-11 | 2.11e+05 | 4250  | 1.94e-06 | 1.90e-06 |
| SL5002                | NLP-8   | 6.24e-09 | 8.18e-11 | 1.39e+05 | 1730  | 3.54e-06 | 3.50e-06 |
| SL5002                | NLP-8   | 2.85e-09 | 3.76e-11 | 2.89e+05 | 3600  | 3.52e-06 | 3.50e-06 |
| SL5002                | NLP-8   | 6.62e-10 | 9.45e-12 | 2.46e+05 | 3540  | 1.49e-06 | 1.50e-06 |
| SL5002                | NLP-8   | 3.02e-10 | 5.11e-12 | 5.53e+05 | 9210  | 1.9e-06  | 1.90e-06 |
| SL5002                | Procrit | 3.58e-08 | 2.09e-10 | 10800    | 53.8  | 1.2e-06  | 1.20e-06 |
| SL5002                | Procrit | 2.28e-08 | 1.27e-10 | 16400    | 77.9  | 1.07e-06 | 1.10e-06 |
| SL5002                | Procrit | 1.89e-08 | 9.35e-11 | 21600    | 96.9  | 8.38e-07 | 8.00e-07 |
| SL5002                | Procrit | 1.89e-08 | 1.6e-10  | 24800    | 202   | 1.05e-06 | 1.00e-06 |
| SL5002                | Procrit | 1.09e-07 | 1.35e-08 | 5190     | 644   | 2.03e-06 | 2.00e-06 |
| SL5002                | Procrit | 8.54e-09 | 1.58e-10 | 1.79e+05 | 3170  | 8.21e-06 | 8.20e-06 |
| SL5002                | Procrit | 2.37e-09 | 4.18e-11 | 4.88e+05 | 8140  | 6.7e-06  | 6.70e-06 |
| SL5002                | Procrit | 7.79e-09 | 3.18e-10 | 5.12e+05 | 20400 | 3.36e-05 | 3.36e-05 |
| SL5003                | BiSi-1  | 5.17e-10 | 4.89e-12 | 6.78e+05 | 5370  | 1.81e-06 | 1.80e-06 |
| SL5003                | BiSi-1  | 4.42e-10 | 3.90e-12 | 6.61e+05 | 4700  | 1.53e-06 | 1.50e-06 |
| SL5003                | BiSi-1  | 7.98e-10 | 5.67e-12 | 4.71e+05 | 3630  | 1.42e-06 | 1.40e-06 |
| SL5003                | BiSi-1  | 1.11e-09 | 8.54e-12 | 2.11e+05 | 1950  | 4.71e-07 | 5.00e-07 |
| SL5003                | BiSi-1  | 6.00e-09 | 1.08e-09 | 2.89e+04 | 6400  | 7.74e-07 | 8.00e-07 |
| SL5003                | BiSi-2  | 4.74e-10 | 3.37e-12 | 7.93e+05 | 5870  | 1.6e-06  | 1.60e-06 |
| SL5003                | BiSi-2  | 5.12e-10 | 3.71e-12 | 6.09e+05 | 4920  | 1.08e-06 | 1.10e-06 |
| SL5003                | BiSi-2  | 1.14e-09 | 2.36e-11 | 1.90e+05 | 4820  | 5.91e-07 | 6.00e-07 |
| SL5003                | BiSi-3  | 6.48e-10 | 7.20e-12 | 5.49e+05 | 5340  | 1.9e-06  | 1.90e-06 |
| SL5003                | BiSi-3  | 5.69e-10 | 5.06e-12 | 5.77e+05 | 4190  | 1.68e-06 | 1.70e-06 |
| SL5003                | BiSi-3  | 5.45e-10 | 4.81e-12 | 5.20e+05 | 3800  | 1.41e-06 | 1.40e-06 |
| SL5003                | BiSi-3  | 1.01e-09 | 7.05e-12 | 3.23e+05 | 2500  | 1.1e-06  | 1.10e-06 |
| SL5003                | BiSi-3  | 1.05e-09 | 1.04e-11 | 1.75e+05 |       |          |          |
