# Supplementary material for: Modified aptamers as reagents to characterize recombinant human erythropoietin products
Source: PubMed Central journal article supplement (PMC7596557; doi:10.1038/s41598-020-75713-2), 2020-10-29
Supplement: 41598_2020_75713_MOESM3_ESM.pdf [file 41598_2020_75713_MOESM3_ESM.pdf]

| Supplemental Table 3: |         |             |         |                  |
|-----------------------|---------|-------------|---------|------------------|
| SOMAmer               | Product | Measurement | P-Value | Adjusted P-value |
| SL5001                | Procrit | KD          | 0.5658  | 0.7230           |
| SL5001                | Procrit | ka          | 0.9677  | 0.9892           |
| SL5001                | Procrit | kd          | 0.6588  | 0.7752           |
| SL5001                | BIS-1   | KD          | 0.4386  | 0.6439           |
| SL5001                | BIS-1   | ka          | 0.4855  | 0.6624           |
| SL5001                | BIS-1   | kd          | 0.3865  | 0.6353           |
| SL5001                | BIS-2   | KD          | 0.4286  | 0.6439           |
| SL5001                | BIS-2   | ka          | 0.4266  | 0.6439           |
| SL5001                | BIS-2   | kd          | 0.3223  | 0.5797           |
| SL5001                | BIS-3   | KD          | 0.4833  | 0.6624           |
| SL5001                | BIS-3   | ka          | 0.7882  | 0.8633           |
| SL5001                | BIS-3   | kd          | 0.4032  | 0.6359           |
| SL5001                | NLP-1   | KD          | 0.3188  | 0.5797           |
| SL5001                | NLP-1   | ka          | 0.4040  | 0.6359           |
| SL5001                | NLP-1   | kd          | 0.0073  | 0.0842           |
| SL5001                | NLP-2   | KD          | 0.8905  | 0.9453           |
| SL5001                | NLP-2   | ka          | 0.4445  | 0.6457           |
| SL5001                | NLP-2   | kd          | 0.4561  | 0.6488           |
| SL5001                | NLP-3   | KD          | 0.0071  | 0.0842           |
| SL5001                | NLP-3   | ka          | 0.2053  | 0.5243           |
| SL5001                | NLP-3   | kd          | 0.0171  | 0.1685           |
| SL5001                | NLP-4   | KD          | 0.9549  | 0.9833           |
| SL5001                | NLP-4   | ka          | 0.7599  | 0.8388           |
| SL5001                | NLP-4   | kd          | 0.9864  | 0.9906           |
| SL5001                | NLP-5   | KD          | 0.2996  | 0.5797           |
| SL5001                | NLP-5   | ka          | 0.0937  | 0.3495           |
| SL5001                | NLP-5   | kd          | 0.9800  | 0.9906           |
| SL5001                | NLP-6   | KD          | 0.3366  | 0.5807           |
| SL5001                | NLP-6   | ka          | 0.0915  | 0.3495           |
| SL5001                | NLP-6   | kd          | 0.1721  | 0.4947           |
| SL5001                | NLP-7   | KD          | 0.7395  | 0.8230           |
| SL5001                | NLP-7   | ka          | 0.4514  | 0.6488           |
| SL5001                | NLP-7   | kd          | 0.8280  | 0.8927           |
| SL5001                | NLP-8   | KD          | 0.6401  | 0.7615           |
| SL5001                | NLP-8   | ka          | 0.5018  | 0.6723           |
| SL5001                | NLP-8   | kd          | 0.7056  | 0.8048           |
| SL5002                | Procrit | KD          | 0.2107  | 0.5243           |
| SL5002                | Procrit | ka          | 0.1933  | 0.5243           |
| SL5002                | Procrit | kd          | 0.1928  | 0.5243           |
| SL5002                | BIS-1   | KD          | 0.5789  | 0.7292           |
| SL5002                | BIS-1   | ka          | 0.4313  | 0.6439           |
| SL5002                | BIS-1   | kd          | 0.2124  | 0.5243           |
| SL5002                | BIS-2   | KD          | 0.2165  | 0.5243           |
| SL5002                | BIS-2   | ka          | 0.2146  | 0.5243           |
| SL5002                | BIS-2   | kd          | 0.1302  | 0.4277           |
| SL5002                | BIS-3   | KD          | NA      | NA               |
| SL5002                | BIS-3   | ka          | NA      | NA               |
| SL5002                | BIS-3   | kd          | NA      | NA               |
| SL5002                | NLP-1   | KD          | 0.1711  | 0.4947           |
| SL5002                | NLP-1   | ka          | 0.3417  | 0.5821           |
| SL5002                | NLP-1   | kd          | 0.0603  | 0.2774           |
| SL5002                | NLP-2   | KD          | 0.0489  | 0.2774           |
| SL5002                | NLP-2   | ka          | 0.2305  | 0.5378           |
| SL5002                | NLP-2   | kd          | 0.0700  | 0.3018           |
| SL5002                | NLP-3   | KD          | 0.0495  | 0.2774           |
| SL5002                | NLP-3   | ka          | 0.2455  | 0.5378           |
| SL5002                | NLP-3   | kd          | 0.0726  | 0.3036           |
| SL5002                | NLP-4   | KD          | NA      | NA               |
| SL5002                | NLP-4   | ka          | NA      | NA               |
| SL5002                | NLP-4   | kd          | NA      | NA               |
| SL5002                | NLP-5   | KD          | 0.1614  | 0.4843           |
| SL5002                | NLP-5   | ka          | 0.0257  | 0.1968           |
| SL5002                | NLP-5   | kd          | 0.0686  | 0.3018           |
| SL5002                | NLP-6   | KD          | 0.3319  | 0.5797           |
| SL5002                | NLP-6   | ka          | 0.9304  | 0.9727           |
| SL5002                | NLP-6   | kd          | 0.2520  | 0.5434           |
| SL5002                | NLP-7   | KD          | 0.9434  | 0.9789           |
| SL5002                | NLP-7   | ka          | 0.5277  | 0.6909           |
| SL5002                | NLP-7   | kd          | 0.7036  | 0.8048           |
| SL5002                | NLP-8   | KD          | 0.8999  | 0.9480           |
| SL5002                | NLP-8   | ka          | 0.2633  | 0.5579           |
| SL5002                | NLP-8   | kd          | 0.9906  | 0.9906           |
| SL5003                | Procrit | KD          | 0.5650  | 0.7230           |
| SL5003                | Procrit | ka          | 0.6016  | 0.7360           |
| SL5003                | Procrit | kd          | 0.6009  | 0.7360           |
| SL5003                | BIS-1   | KD          | 0.2766  | 0.5697           |
| SL5003                | BIS-1   | ka          | 0.0491  | 0.2774           |
| SL5003                | BIS-1   | kd          | 0.4896  | 0.6624           |
| SL5003                | BIS-2   | KD          | 0.3312  | 0.5797           |
| SL5003                | BIS-2   | ka          | 0.3250  | 0.5797           |
| SL5003                | BIS-2   | kd          | 0.6826  | 0.7915           |
| SL5003                | BIS-3   | KD          | 0.0984  | 0.3558           |
| SL5003                | BIS-3   | ka          | 0.0057  | 0.0842           |
| SL5003                | BIS-3   | kd          | 0.4040  | 0.6359           |
| SL5003                | NLP-1   | KD          | 0.1568  | 0.4809           |
| SL5003                | NLP-1   | ka          | 0.0052  | 0.0842           |
| SL5003                | NLP-1   | kd          | 0.0112  | 0.1187           |
| SL5003                | NLP-2   | KD          | 0.0216  | 0.1843           |
| SL5003                | NLP-2   | ka          | 0.0311  | 0.2257           |
| SL5003                | NLP-2   | kd          | 0.2430  | 0.5378           |
| SL5003                | NLP-3   | KD          | 0.0020  | 0.0673           |
| SL5003                | NLP-3   | ka          | 0.0044  | 0.0842           |
| SL5003                | NLP-3   | kd          | 0.0227  | 0.1843           |
| SL5003                | NLP-4   | KD          | 0.5307  | 0.6909           |
| SL5003                | NLP-4   | ka          | 0.6629  | 0.7752           |
| SL5003                | NLP-4   | kd          | 0.8019  | 0.8714           |
| SL5003                | NLP-5   | KD          | 0.2830  | 0.5698           |
| SL5003                | NLP-5   | ka          | 0.3867  | 0.6353           |
| SL5003                | NLP-5   | kd          | 0.7275  | 0.8162           |
| SL5003                | NLP-6   | KD          | 0.1031  | 0.3558           |
| SL5003                | NLP-6   | ka          | 0.6080  | 0.7360           |
| SL5003                | NLP-6   | kd          | 0.2849  | 0.5698           |
| SL5003                | NLP-7   | KD          | 0.2668  | 0.5579           |
| SL5003                | NLP-7   | ka          | 0.0898  | 0.3495           |
| SL5003                | NLP-7   | kd          | 0.5247  | 0.6909           |
| SL5003                | NLP-8   | KD          | 0.4101  | 0.6359           |
| SL5003                | NLP-8   | ka          | 0.1016  | 0.3558           |
| SL5003                | NLP-8   | kd          | 0.4348  | 0.6439           |
| SL5004                | Procrit | KD          | 0.3862  | 0.6353           |
| SL5004                | Procrit | ka          | 0.3237  | 0.5797           |
| SL5004                | Procrit | kd          | 0.0493  | 0.2774           |
| SL5004                | BIS-1   | KD          | 0.2930  | 0.5776           |
| SL5004                | BIS-1   | ka          | 0.6382  | 0.7615           |
| SL5004                | BIS-1   | kd          | 0.2274  | 0.5378           |
| SL5004                | BIS-2   | KD          | 0.8748  | 0.9358           |
| SL5004                | BIS-2   | ka          | 0.1521  | 0.4769           |
| SL5004                | BIS-2   | kd          | 0.0194  | 0.1787           |
| SL5004                | BIS-3   | KD          | 0.2117  | 0.5243           |
| SL5004                | BIS-3   | ka          | 0.3199  | 0.5797           |
| SL5004                | BIS-3   | kd          | 0.4831  | 0.6624           |
| SL5004                | NLP-1   | KD          | 0.6050  | 0.7360           |
| SL5004                | NLP-1   | ka          | 0.1207  | 0.4063           |
| SL5004                | NLP-1   | kd          | 0.0009  | 0.0599           |
| SL5004                | NLP-2   | KD          | 0.0071  | 0.0842           |
| SL5004                | NLP-2   | ka          | 0.0557  | 0.2774           |
| SL5004                | NLP-2   | kd          | 0.1504  | 0.4769           |
| SL5004                | NLP-3   | KD          | 0.0556  | 0.2774           |
| SL5004                | NLP-3   | ka          | 0.0873  | 0.3495           |
| SL5004                | NLP-3   | kd          | 0.0038  | 0.0842           |
| SL5004                | NLP-4   | KD          | 0.4717  | 0.6624           |
| SL5004                | NLP-4   | ka          | 0.0529  | 0.2774           |
| SL5004                | NLP-4   | kd          | 0.0343  | 0.2364           |
| SL5004                | NLP-5   | KD          | 0.0582  | 0.2774           |
| SL5004                | NLP-5   | ka          | 0.0015  | 0.0673           |
| SL5004                | NLP-5   | kd          | 0.0071  | 0.0842           |
| SL5004                | NLP-6   | KD          | 0.2374  | 0.5378           |
| SL5004                | NLP-6   | ka          | 0.5813  | 0.7292           |
| SL5004                | NLP-6   | kd          | 0.0003  | 0.0397           |
| SL5004                | NLP-7   | KD          | 0.7268  | 0.8162           |
| SL5004                | NLP-7   | ka          | 0.2014  | 0.5243           |
| SL5004                | NLP-7   | kd          | 0.0603  | 0.2774           |
| SL5004                | NLP-8   | KD          | 0.4078  | 0.6359           |
| SL5004                | NLP-8   | ka          | 0.2391  | 0.5378           |
| SL5004                | NLP-8   | kd          | 0.3110  | 0.5797           |
